# Supplementary material for: The Staphylococcus aureus ABC-Type Manganese Transporter MntABC Is Critical for Reinitiation of Bacterial Replication Following Exposure to Phagocytic Oxidative Burst
Source: PubMed Central journal article supplement (PMC4574778; doi:10.1371/journal.pone.0138350), 2015-09-17
Supplement: pone.0138350.s007.pdf [file pone.0138350.s007.pdf]

**Table S1 Primers used for qRT-PCR**

| <b>Gene</b>  | <b>Forward primer sequence</b>  | <b>Reverse primer sequence</b>  | <b>Reporter (FAM) sequence</b> |
|--------------|---------------------------------|---------------------------------|--------------------------------|
| <i>recA</i>  | CGTTACGTAAACTTTTCAGGTGCTATTTCTA | GTGTAGTCTCTGGATTACCGAACAT       | TCATCAACCAAATTCG               |
| <i>uvrA</i>  | TGGTGAAGCACAAACGTATTCGATTA      | GCAGTCCAATTGATGGCTCATCTAATA     | ACGCGACCCAATTTG                |
| <i>trxB</i>  | GCAGTATGTGATGGTGCATTCTTT        | GAATGTTCCCTCTTCTACTGCTGAA       | ACCACCACCGATAACG               |
| <i>sodM</i>  | TGAAGAAAAAGGTGGCGTAATAGATGA     | CCAAGTCCAACCTGATCCAAATAATGT     | CCACTGCGCTTTGATG               |
| <i>nth</i>   | TGGAGAAATACCACAAACACATAAGGAAT   | TTCATCAAATGCTACACTCATGACTACA    | CACCTGCTAAACTTTC               |
| <i>nrdEF</i> | GGTTGCAAACCCAAATGTTGAGAAA       | CCTGATTGTAATTGTGTTTGCGCAAT      | TTTCACGCGCATTCTT               |
| <i>katA</i>  | GCGTTTGCACCAACTAATATTATTCCA     | GCGCATCGCCATATGAGAATAAAC        | CCTTGCAGCATTTTGT               |
| <i>sodA</i>  | AGTGTACCAGCTAACATCCAAACTG       | GTGAAAGTAACTCCCAGAATAATGAATGG   | CCACCGCCATTATTAC               |
| <i>ahpC</i>  | AGACGGTGTGTACAAGCATCTG          | GTACTAGCGTCACGGCCAATT           | CCGTCAGCGTTAATTT               |
| <i>srtA</i>  | GCAAGCTAAACCTCAAATTCGAAA        | GCTGGTCCTGGATATACTGGTTCTTTAATAT | TAGCCTGCCACTTTTCG              |
| <i>rrsA</i>  | GGTCTGTAAGTACGCTGATGTG          | GTGGACTACCAGGTATCTAATCCT        | TCCCCACGCTTTTCG                |
