# Supplementary material for: The Staphylococcus aureus ABC-Type Manganese Transporter MntABC Is Critical for Reinitiation of Bacterial Replication Following Exposure to Phagocytic Oxidative Burst
Source: PubMed Central journal article supplement (PMC4574778; doi:10.1371/journal.pone.0138350), 2015-09-17
Supplement: pone.0138350.s008.pdf [file pone.0138350.s008.pdf]

**Table S2 Proteins identified in the reverse labeled lysates with "Heavy" wild-type and "Light" *mntC***

| Protein symbol | Gene names    | Observations | Log2 ratio ( $\Delta mntC$ /WT) | z-score | Log2 summed signal intensity |
|----------------|---------------|--------------|---------------------------------|---------|------------------------------|
| C5N6C1_STAA3   | pyk           | 1311         | 0.82                            | 2.50    | 71.26                        |
| C5N310_STAA3   | nrdE          | 731          | 2.14                            | 4.36    | 67.52                        |
| C5N4L2_STAA3   | isdB          | 602          | 1.61                            | 2.37    | 64.49                        |
| C5N2N2_STAA3   | atpD          | 414          | -1.20                           | -2.17   | 67.81                        |
| C5N193_STAA3   | pflB          | 343          | 2.49                            | 3.01    | 63.23                        |
| C5N0T1_STAA3   | serS          | 272          | -2.07                           | -3.75   | 66.28                        |
| C5N4F5_STAA3   | purH          | 262          | 2.78                            | 3.12    | 60.81                        |
| C5N018_STAA3   | SAUSA300_2412 | 182          | 1.41                            | 2.08    | 64.31                        |
| C5N311_STAA3   | nrdF          | 159          | 2.88                            | 4.36    | 65.28                        |
| C5N6D3_STAA3   | SAUSA300_1656 | 136          | -1.39                           | -2.08   | 65.86                        |
| C5N019_STAA3   | SAUSA300_2413 | 86           | 4.99                            | 3.72    | 56.51                        |
| C5N584_STAA3   | SAUSA300_1226 | 80           | -2.39                           | -2.57   | 59.33                        |
| C5N592_STAA3   | rpsN          | 55           | -1.77                           | -2.03   | 60.30                        |
| C5N3F4_STAA3   | SAUSA300_0693 | 52           | -1.94                           | -2.32   | 61.61                        |
| C5N101_STAA3   | SAUSA300_0129 | 47           | -1.82                           | -2.16   | 63.36                        |
| C5N0Z8_STAA3   | SAUSA300_0126 | 41           | 3.38                            | 2.35    | 55.67                        |
| C5N1L3_STAA3   | SAUSA300_0328 | 36           | -1.72                           | -2.01   | 60.49                        |
| C5N3L7_STAA3   | SAUSA300_0748 | 36           | 6.32                            | 7.53    | 61.29                        |
| C5N6S7_STAA3   | SAUSA300_1797 | 36           | 5.37                            | 5.38    | 58.85                        |
| C5N425_STAA3   | SAUSA300_0848 | 34           | 3.99                            | 2.36    | 53.81                        |
| C5N1B0_STAA3   | ldh           | 33           | 2.52                            | 2.33    | 58.53                        |
| C5N585_STAA3   | thrC          | 33           | -2.30                           | -2.20   | 58.46                        |
| C5N3S1_STAA3   | SAUSA300_0798 | 32           | -3.61                           | -2.63   | 55.40                        |
| C5N403_STAA3   | SAUSA300_0828 | 17           | -3.38                           | -2.48   | 55.99                        |
| C5N694_STAA3   | hemC          | 15           | -2.63                           | -2.05   | 56.55                        |
| C5MZ66_STAA3   | SAUSA300_2161 | 14           | -4.82                           | -2.97   | 54.48                        |
| C5N1G2_STAA3   | essC          | 13           | 4.27                            | 2.62    | 53.96                        |
| C5N6B7_STAA3   | SAUSA300_1639 | 9            | 5.95                            | 2.96    | 52.61                        |
| C5MYM6_STAA3   | SAUSA300_1875 | 9            | 5.09                            | 2.14    | 50.76                        |
| C5N3Y2_STAA3   | SAUSA300_1388 | 8            | -5.03                           | -2.45   | 52.37                        |
| C5N6F3_STAA3   | SAUSA300_1677 | 8            | 6.13                            | 2.27    | 49.09                        |
| C5N132_STAA3   | SAUSA300_0158 | 7            | 4.68                            | 2.30    | 52.48                        |
| C5N0T0_STAA3   | hutH          | 5            | -8.06                           | -3.15   | 50.17                        |
| C5N467_STAA3   | SAUSA300_0888 | 5            | -4.97                           | -2.50   | 52.71                        |
| C5MZ94_STAA3   | SAUSA300_2148 | 5            | -6.58                           | -2.93   | 51.45                        |
| C5MZC1_STAA3   | secY          | 4            | 5.55                            | 2.57    | 51.99                        |
| C5MZ45_STAA3   | ilvD          | 3            | -6.98                           | -2.27   | 46.91                        |
| C5MYR1_STAA3   | perB          | 3            | -8.22                           | -2.50   | 45.31                        |
| C5N493_STAA3   | SAUSA300_0915 | 3            | 7.90                            | 2.86    | 48.57                        |
| C5MYT1_STAA3   | SAUSA300_1908 | 3            | 6.30                            | 2.29    | 48.63                        |
| C5N2L9_STAA3   | SAUSA300_2070 | 3            | -5.36                           | -2.98   | 53.37                        |
| C5N0A0_STAA3   | feoB          | 2            | -9.88                           | -3.09   | 46.33                        |
| C5N258_STAA3   | SAUSA300_2359 | 2            | 7.77                            | 2.87    | 49.06                        |
